# Supplementary material for: Genome-Wide Identification and Expression Analysis of WRKY Transcription Factors in Akebia trifoliata: A Bioinformatics Study
Source: MDPI journal article supplement (doi:10.3390/genes13091540), 2022-08-26
Supplement: s1 [file s1]

## Supplementary Figures

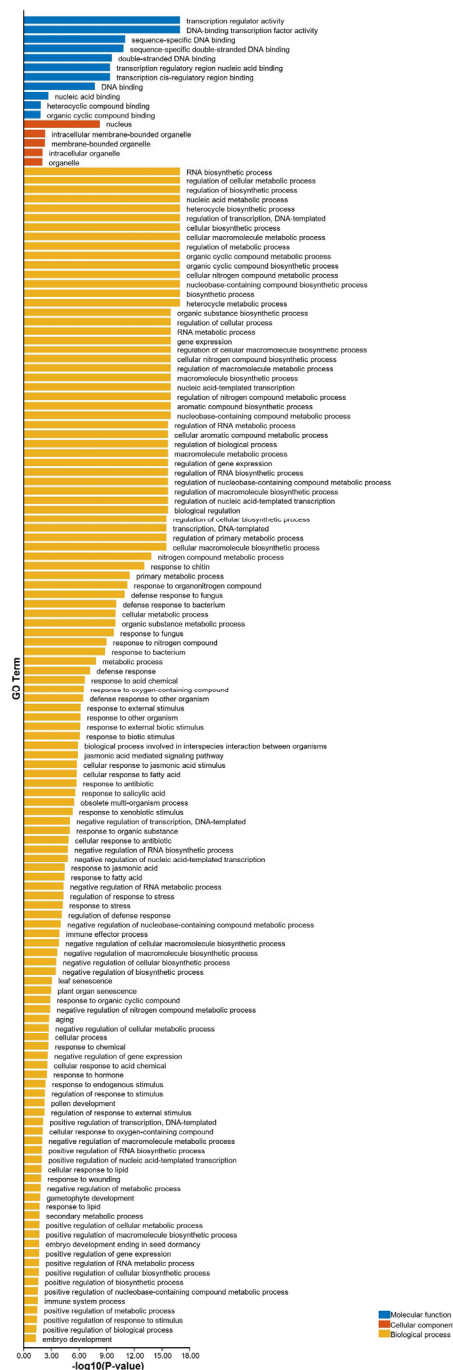

**Figure S1.** GO enrichment analysis map of the *WRKY* gene family. Blue blocks represent molecular functions, orange blocks represent cellular components, and yellow blocks represent biological processes.

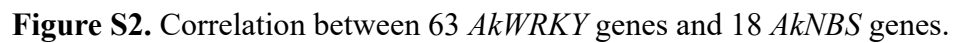

**Figure S2.** Correlation between 63 *AkWRKY* genes and 18 *AkNBS* genes.
